# Supplementary material for: Exercise and Rehabilitation in People With Ehlers-Danlos Syndrome: A Systematic Review
Source: PubMed Central journal article supplement — Arch Rehabil Res Clin Transl. 2022 Mar 4;4(2):100189. doi: 10.1016/j.arrct.2022.100189 (PMC9214343; doi:10.1016/j.arrct.2022.100189), 2022-03-04
Supplement: mmc1.pdf [file mmc1.pdf]

**Table A: PRISMA Checklist**

| Section/topic                      | #  | Checklist item                                                                                                                                                                                                                                                                                              | Reported on page #    |
|------------------------------------|----|-------------------------------------------------------------------------------------------------------------------------------------------------------------------------------------------------------------------------------------------------------------------------------------------------------------|-----------------------|
| <b>TITLE</b>                       |    |                                                                                                                                                                                                                                                                                                             |                       |
| Title                              | 1  | Identify the report as a systematic review, meta-analysis, or both.                                                                                                                                                                                                                                         | 1                     |
| <b>ABSTRACT</b>                    |    |                                                                                                                                                                                                                                                                                                             |                       |
| Structured summary                 | 2  | Provide a structured summary including, as applicable: background; objectives; data sources; study eligibility criteria, participants, and interventions; study appraisal and synthesis methods; results; limitations; conclusions and implications of key findings; systematic review registration number. | 1-2                   |
| <b>INTRODUCTION</b>                |    |                                                                                                                                                                                                                                                                                                             |                       |
| Rationale                          | 3  | Describe the rationale for the review in the context of what is already known.                                                                                                                                                                                                                              | 3-4                   |
| Objectives                         | 4  | Provide an explicit statement of questions being addressed with reference to participants, interventions, comparisons, outcomes, and study design (PICOS).                                                                                                                                                  | 5                     |
| <b>METHODS</b>                     |    |                                                                                                                                                                                                                                                                                                             |                       |
| Protocol and registration          | 5  | Indicate if a review protocol exists, if and where it can be accessed (e.g., Web address), and, if available, provide registration information including registration number.                                                                                                                               | 2                     |
| Eligibility criteria               | 6  | Specify study characteristics (e.g., PICOS, length of follow-up) and report characteristics (e.g., years considered, language, publication status) used as criteria for eligibility, giving rationale.                                                                                                      | TABLE 1               |
| Information sources                | 7  | Describe all information sources (e.g., databases with dates of coverage, contact with study authors to identify additional studies) in the search and date last searched.                                                                                                                                  | 5                     |
| Search                             | 8  | Present full electronic search strategy for at least one database, including any limits used, such that it could be repeated.                                                                                                                                                                               | SUPP MATERIAL TABLE B |
| Study selection                    | 9  | State the process for selecting studies (i.e., screening, eligibility, included in systematic review, and, if applicable, included in the meta-analysis).                                                                                                                                                   | 5                     |
| Data collection process            | 10 | Describe method of data extraction from reports (e.g., piloted forms, independently, in duplicate) and any processes for obtaining and confirming data from investigators.                                                                                                                                  | 6                     |
| Data items                         | 11 | List and define all variables for which data were sought (e.g., PICOS, funding sources) and any assumptions and simplifications made.                                                                                                                                                                       | SUPP MATERIAL TABLE C |
| Risk of bias in individual studies | 12 | Describe methods used for assessing risk of bias of individual studies (including specification of whether this was done at the study or outcome level), and how this information is to be used in any data synthesis.                                                                                      | 6-7                   |
| Summary measures                   | 13 | State the principal summary measures (e.g., risk ratio, difference in means).                                                                                                                                                                                                                               | N/A                   |
| Synthesis of results               | 14 | Describe the methods of handling data and combining results of studies, if done, including measures of consistency (e.g., $I^2$ ) for each meta-analysis.                                                                                                                                                   | N/A                   |

| Section/topic               | #  | Checklist item                                                                                                                                                  | Reported on page # |
|-----------------------------|----|-----------------------------------------------------------------------------------------------------------------------------------------------------------------|--------------------|
| Risk of bias across studies | 15 | Specify any assessment of risk of bias that may affect the cumulative evidence (e.g., publication bias, selective reporting within studies).                    | 6-8                |
| Additional analyses         | 16 | Describe methods of additional analyses (e.g., sensitivity or subgroup analyses, meta-regression), if done, indicating which were pre-specified.                | 8                  |
| <b>RESULTS</b>              |    |                                                                                                                                                                 |                    |
| Study selection             | 17 | Give numbers of studies screened, assessed for eligibility, and included in the review, with reasons for exclusions at each stage, ideally with a flow diagram. | FIGURE 1           |
| Study                       | 18 | For each study, present characteristics for which data were extracted (e.g., study                                                                              | TABLE 2            |

|                               |    |                                                                                                                                                                                                          |             |
|-------------------------------|----|----------------------------------------------------------------------------------------------------------------------------------------------------------------------------------------------------------|-------------|
| characteristics               |    | size, PICOS, follow-up period) and provide the citations.                                                                                                                                                |             |
| Risk of bias within studies   | 19 | Present data on risk of bias of each study and, if available, any outcome level assessment (see item 12).                                                                                                | TABLE 3 & 4 |
| Results of individual studies | 20 | For all outcomes considered (benefits or harms), present, for each study: (a) simple summary data for each intervention group (b) effect estimates and confidence intervals, ideally with a forest plot. | TABLE 6     |
| Synthesis of results          | 21 | Present the main results of the review. If meta-analyses are done, include for each, confidence intervals and measures of consistency                                                                    | 10-17       |
| Risk of bias across studies   | 22 | Present results of any assessment of risk of bias across studies (see Item 15).                                                                                                                          | 9           |
| Additional analysis           | 23 | Give results of additional analyses, if done (e.g., sensitivity or subgroup analyses, meta-regression [see Item 16]).                                                                                    | TABLE 5     |
| <b>DISCUSSION</b>             |    |                                                                                                                                                                                                          |             |
| Summary of evidence           | 24 | Summarize the main findings including the strength of evidence for each main outcome; consider their relevance to key groups (e.g., healthcare providers, users, and policy makers).                     | 18-21       |
| Limitations                   | 25 | Discuss limitations at study and outcome level (e.g., risk of bias), and at review-level (e.g., incomplete retrieval of identified research, reporting bias).                                            | 21-22       |
| Conclusions                   | 26 | Provide a general interpretation of the results in the context of other evidence, and implications for future research.                                                                                  | 22          |
| <b>FUNDING</b>                |    |                                                                                                                                                                                                          |             |
| Funding                       | 27 | Describe sources of funding for the systematic review and other support (e.g., supply of data); role of funders for the systematic review.                                                               | 23          |

**Table B: Medline full search strategy: Ovid MEDLINE(R) 1946 to November 27, 2020**

| #  | Searches                                              | Results |
|----|-------------------------------------------------------|---------|
| 1  | Ehlers-Danlos Syndrome/                               | 3053    |
| 2  | Ehlers Danlos Syndrome*.mp.                           | 3464    |
| 3  | Arthrochalasis Multiplex Congenita.mp.                | 4       |
| 4  | Benign hypermobility syndrome*.mp.                    | 14      |
| 5  | Benign Joint Hypermobility Syndrome*.mp.              | 88      |
| 6  | BJHS.mp.                                              | 51      |
| 7  | Brittle cornea syndrome*.mp.                          | 43      |
| 8  | "connective tissue disorder?".mp.                     | 3001    |
| 9  | COL3A1 protein*.mp.                                   | 268     |
| 10 | Cutis Elastica.mp.                                    | 2       |
| 11 | Cutis Laxa.mp.                                        | 910     |
| 12 | defective biosynthesis of Proteodermatan sulfate*.mp. | 0       |
| 13 | Dermatosparax*.mp.                                    | 75      |
| 14 | (disorder? adj2 connective tissue?).mp.               | 3582    |
| 15 | EDS IV.mp.                                            | 58      |
| 16 | EDS IVA.mp.                                           | 0       |
| 17 | EDS VI.mp.                                            | 25      |
| 18 | EDS VIB.mp.                                           | 4       |
| 19 | EDS VIIA.mp.                                          | 4       |
| 20 | EDS VIIC.mp.                                          | 3       |
| 21 | EDS VIII.mp.                                          | 7       |
| 22 | EDS X.mp.                                             | 109     |
| 23 | EDS XI.mp.                                            | 0       |
| 24 | EDS10.mp.                                             | 2       |
| 25 | EDS4A.mp.                                             | 0       |
| 26 | EDS6.mp.                                              | 1       |
| 27 | EDS6B.mp.                                             | 0       |
| 28 | EDS7A.mp.                                             | 0       |
| 29 | EDS7C.mp.                                             | 0       |
| 30 | EDS8.mp.                                              | 4       |
| 31 | EDS9.mp.                                              | 1       |
| 32 | EDS-HT.mp.                                            | 70      |
| 33 | EhlersDanlos*.mp.                                     | 1       |
| 34 | Ehlers Danlos*.mp.                                    | 3531    |

|    |                                                            |       |
|----|------------------------------------------------------------|-------|
| 35 | Ehlers Danlos Disease*.mp.                                 | 45    |
| 36 | Ehlers Danlos Syndrome*.mp.                                | 3464  |
| 37 | FKBP14-kEDS.mp.                                            | 1     |
| 38 | Fragilitas oculi with joint hyperextensibility*.mp.        | 0     |
| 39 | Galactosyltransferase 1 deficienc*.mp.                     | 0     |
| 40 | Galactosyltransferase I Deficienc*.mp.                     | 2     |
| 41 | hEDS.mp.                                                   | 71    |
| 42 | Hernandez Aguirre-Negrete syndrome*.mp.                    | 0     |
| 43 | "joint hypermobility".mp.                                  | 897   |
| 44 | "joint hyper-mobility".mp.                                 | 4     |
| 45 | kEDS.mp.                                                   | 96    |
| 46 | mcEDS.mp.                                                  | 4     |
| 47 | mcEDS-CHST14.mp.                                           | 1     |
| 48 | Osteochondrodysplasi*.mp.                                  | 5211  |
| 49 | SCDEDS.mp.                                                 | 0     |
| 50 | EDS-ZIP13.mp.                                              | 1     |
| 51 | spEDS-ZIP13.mp.                                            | 1     |
| 52 | Syndrome d-Ehlers-Danlos.mp.                               | 0     |
| 53 | vEDS.mp.                                                   | 72    |
| 54 | Xylosylprotein 4-beta-galactosyltransferase deficienc*.mp. | 0     |
| 55 | or/1-54 [ Ehlers Danlos Syndrome & related terms ]         | 13509 |
| 56 | "Physical and Rehabilitation Medicine"/                    | 3096  |
| 57 | "Recovery of Function"/                                    | 47695 |
| 58 | Acupressure/                                               | 676   |
| 59 | Animal Assisted Therapy/                                   | 336   |
| 60 | Breathing Exercises/                                       | 3234  |
| 61 | Cardiac Rehabilitation/                                    | 1936  |
| 62 | Dance Therapy/                                             | 332   |
| 63 | Disability Evaluation/                                     | 45434 |
| 64 | Drainage, Postural/                                        | 241   |
| 65 | Electric Stimulation Therapy/                              | 19783 |
| 66 | Electroacupuncture/                                        | 3659  |
| 67 | Endurance Training/                                        | 64    |
| 68 | Equine-Assisted Therapy/                                   | 159   |
| 69 | exp Activities of Daily Living/                            | 96016 |
| 70 | exp Exercise Movement Techniques/                          | 7536  |

|     |                                            |        |
|-----|--------------------------------------------|--------|
| 71  | exp Exercise Therapy/                      | 46320  |
| 72  | exp Exercise/                              | 179277 |
| 73  | exp Health Education/                      | 233103 |
| 74  | exp Musculoskeletal manipulations/         | 15859  |
| 75  | exp Occupational Therapy/                  | 12591  |
| 76  | exp Physical Exertion/                     | 55802  |
| 77  | exp Physical fitness/                      | 27469  |
| 78  | exp Physical Therapy Department, Hospital/ | 322    |
| 79  | exp Physical Therapy Modalities/           | 143786 |
| 80  | exp Physical Therapy Specialty/            | 2704   |
| 81  | exp Physical Therapy Techniques/           | 143786 |
| 82  | exp Rehabilitation Centers/                | 13967  |
| 83  | exp Rehabilitation Nursing/                | 1386   |
| 84  | exp Rehabilitation/                        | 287599 |
| 85  | exp Sports/                                | 172143 |
| 86  | exp Therapy, Computer-Assisted/            | 58319  |
| 87  | Extracorporeal Shockwave Therapy/          | 219    |
| 88  | Hospitals, Rehabilitation/                 | 28     |
| 89  | Hydrotherapy/                              | 2494   |
| 90  | Kinesiology, Applied/                      | 297    |
| 91  | Manipulation, Orthopedic/                  | 3830   |
| 92  | Manipulation, Osteopathic/                 | 973    |
| 93  | Manipulation, Spinal/                      | 1497   |
| 94  | Manual Lymphatic Drainage/                 | 26     |
| 95  | Massage/                                   | 5867   |
| 96  | Motion Therapy, Continuous Passive/        | 668    |
| 97  | Mouth Rehabilitation/                      | 1420   |
| 98  | Muscle Stretching Exercises/               | 1505   |
| 99  | Musculoskeletal Manipulations/             | 1590   |
| 100 | Myofunctional Therapy/                     | 311    |
| 101 | Neurological Rehabilitation/               | 623    |
| 102 | Plyometric Exercise/                       | 488    |
| 103 | Sports For Persons With Disabilities/      | 144    |
| 104 | Pulsed Radiofrequency Treatment/           | 394    |
| 105 | Qigong/                                    | 135    |
| 106 | Rehabilitation Research/                   | 119    |

|     |                                                                                                                      |         |
|-----|----------------------------------------------------------------------------------------------------------------------|---------|
| 107 | Rehabilitation, Vocational/                                                                                          | 9308    |
| 108 | Resistance Training/                                                                                                 | 7454    |
| 109 | Spinal Cord Stimulation/                                                                                             | 850     |
| 110 | Stroke Rehabilitation/                                                                                               | 11865   |
| 111 | Tai Ji/                                                                                                              | 973     |
| 112 | Telerehabilitation/                                                                                                  | 249     |
| 113 | Therapeutic Irrigation/                                                                                              | 17090   |
| 114 | Therapy, Soft Tissue/                                                                                                | 112     |
| 115 | Transcutaneous Electric Nerve Stimulation/                                                                           | 4429    |
| 116 | Treatment Outcome/                                                                                                   | 905669  |
| 117 | Yoga/                                                                                                                | 2540    |
| 118 | rh.fs. [ "Rehabilitation" floating subheading ]                                                                      | 190463  |
| 119 | ((treatment* or therap* or training or education* or healthcare) adj10 (program* or intervention* or approach*)).mp. | 508427  |
| 120 | (early adj1 (mobil* or discharg* or ambulat*)).mp.                                                                   | 8288    |
| 121 | (exercis* adj3 therap*).mp.                                                                                          | 40949   |
| 122 | (exercis* adj5 (train* or physical* or activ*)).mp.                                                                  | 49500   |
| 123 | (functional* adj2 outcome?).mp.                                                                                      | 33384   |
| 124 | (physical* adj5 (fit* or train* or activ* or endur*)).mp.                                                            | 148104  |
| 125 | (physical therap* or physiotherap* or physical stimulation*).mp.                                                     | 77203   |
| 126 | (physical* adj3 (fit* or train* or therap* or activit*)).mp.                                                         | 171869  |
| 127 | (QoL or HRQOL or HR-QOL).mp.                                                                                         | 39770   |
| 128 | (readmission? or re-admission?).mp.                                                                                  | 25581   |
| 129 | (readmit* or re-admit*).mp.                                                                                          | 6053    |
| 130 | (recover* adj4 function*).mp.                                                                                        | 80312   |
| 131 | (strength adj5 train*).mp.                                                                                           | 6731    |
| 132 | (train* adj3 (strength* or aerobic* or exercise*)).mp.                                                               | 25819   |
| 133 | (walk* or jog* or swim* or golf* or bicycl* or cycl*).mp.                                                            | 1319648 |
| 134 | (weight adj5 train*).mp.                                                                                             | 3354    |
| 135 | (weightlift* or weight lift* or resistance train*).mp.                                                               | 14061   |
| 136 | chiropract*.mp.                                                                                                      | 5198    |
| 137 | exercis*.mp.                                                                                                         | 320343  |
| 138 | fitness.mp.                                                                                                          | 71209   |
| 139 | length of stay?.mp.                                                                                                  | 100697  |
| 140 | manual therap*.mp.                                                                                                   | 1721    |
| 141 | osteopath*.mp.                                                                                                       | 6605    |

|            |                                                                                                                                                                                                                                                                             |             |
|------------|-----------------------------------------------------------------------------------------------------------------------------------------------------------------------------------------------------------------------------------------------------------------------------|-------------|
| 142        | physical therap*.mp.                                                                                                                                                                                                                                                        | 47482       |
| 143        | physiotherap*.mp.                                                                                                                                                                                                                                                           | 19826       |
| 144        | physio-therap*.mp.                                                                                                                                                                                                                                                          | 44          |
| 145        | prehab*.mp.                                                                                                                                                                                                                                                                 | 290         |
| 146        | rehab*.mp.                                                                                                                                                                                                                                                                  | 283405      |
| 147        | sport*3.mp.                                                                                                                                                                                                                                                                 | 79667       |
| 148        | telerehab*.mp.                                                                                                                                                                                                                                                              | 555         |
| 149        | tai chi.mp.                                                                                                                                                                                                                                                                 | 1195        |
| 150        | tai ji.mp.                                                                                                                                                                                                                                                                  | 979         |
| 151        | weighttrain*.mp.                                                                                                                                                                                                                                                            | 0           |
| 152        | or/56-151 [ Rehabilitation or Physical Therapy or Physiotherapy & Related term ]                                                                                                                                                                                            | 3721998     |
| <b>153</b> | <b>55 and 152 [ Ehlers-Danlos + Rehab ]</b>                                                                                                                                                                                                                                 | <b>1414</b> |
|            |                                                                                                                                                                                                                                                                             |             |
|            | <i>Limits applied:</i>                                                                                                                                                                                                                                                      |             |
| 154        | limit 153 to english language                                                                                                                                                                                                                                               | 1293        |
| 155        | exp animals/ not (exp animals/ and exp humans/)                                                                                                                                                                                                                             | 4587692     |
| 156        | 154 not 155                                                                                                                                                                                                                                                                 | 1221        |
| 157        | limit 154 to humans                                                                                                                                                                                                                                                         | 1207        |
| 158        | 156 or 157                                                                                                                                                                                                                                                                  | 1221        |
| 159        | limit 158 to ("all infant (birth to 23 months)" or "all child (0 to 18 years)" or "newborn infant (birth to 1 month)" or "infant (1 to 23 months)" or "preschool child (2 to 5 years)" or "child (6 to 12 years)" or "adolescent (13 to 18 years)")                         | 479         |
| 160        | 158 not 159                                                                                                                                                                                                                                                                 | 742         |
| 161        | limit 158 to ("all adult (19 plus years)" or "young adult (19 to 24 years)" or "adult (19 to 44 years)" or "young adult and adult (19-24 and 19-44)" or "middle age (45 to 64 years)" or "middle aged (45 plus years)" or "all aged (65 and over)" or "aged (80 and over)") | 651         |
| 162        | 160 or 161                                                                                                                                                                                                                                                                  | 941         |
| 163        | remove duplicates from 162                                                                                                                                                                                                                                                  | 940         |
|            |                                                                                                                                                                                                                                                                             |             |
|            |                                                                                                                                                                                                                                                                             |             |
| 164        | Clinical Trial, Phase III.pt.                                                                                                                                                                                                                                               | 15110       |
| 165        | Clinical Trial, Phase III/                                                                                                                                                                                                                                                  | 15110       |
| 166        | Clinical Trial.pt.                                                                                                                                                                                                                                                          | 516143      |
| 167        | Clinical Trials, Phase III as Topic/                                                                                                                                                                                                                                        | 8740        |
| 168        | Comparative Study.pt.                                                                                                                                                                                                                                                       | 1831657     |
| 169        | Comparative Study/                                                                                                                                                                                                                                                          | 1831657     |
| 170        | Controlled Clinical Trial.pt.                                                                                                                                                                                                                                               | 93084       |

|     |                                                                             |         |
|-----|-----------------------------------------------------------------------------|---------|
| 171 | Controlled Clinical Trial/                                                  | 93084   |
| 172 | Controlled Clinical Trials as Topic/                                        | 5420    |
| 173 | Cross-Sectional Studies/                                                    | 295842  |
| 174 | Double-Blind Method/                                                        | 151644  |
| 175 | Equivalence Trial.pt.                                                       | 312     |
| 176 | Equivalence Trial/                                                          | 312     |
| 177 | Equivalence Trials as Topic/                                                | 165     |
| 178 | Evaluation Studies.pt.                                                      | 243613  |
| 179 | exp Case-Control Studies/                                                   | 997479  |
| 180 | exp Cohort Studies/                                                         | 1864656 |
| 181 | exp Randomized Controlled Trial/                                            | 483720  |
| 182 | exp Randomized Controlled Trials as Topic/                                  | 126808  |
| 183 | Longitudinal Studies/                                                       | 123927  |
| 184 | Meta-Analysis as Topic/                                                     | 16986   |
| 185 | Meta-Analysis/                                                              | 101654  |
| 186 | Multicenter Studies as Topic/                                               | 17581   |
| 187 | Multicenter Study.pt.                                                       | 251447  |
| 188 | Multicenter Study/                                                          | 251447  |
| 189 | Placebos/                                                                   | 34368   |
| 190 | Pragmatic Clinical Trial.pt.                                                | 1063    |
| 191 | Pragmatic Clinical Trial/                                                   | 1063    |
| 192 | Pragmatic Clinical Trials as Topic/                                         | 305     |
| 193 | Prospective Studies/                                                        | 504522  |
| 194 | Randomized Controlled Trial.pt.                                             | 483170  |
| 195 | Retrospective Studies/                                                      | 752566  |
| 196 | Validation Studies.pt.                                                      | 95269   |
| 197 | ("phase 3" or "phase3" or "phase III").mp.                                  | 47366   |
| 198 | ((multicenter* or multicentre*) adj2 (trial? or study or studies)).mp.      | 282745  |
| 199 | ((noninferiority or non-inferiority) adj4 (trial? or study or studies)).mp. | 3319    |
| 200 | ((single or double or triple or treble) adj3 (blind* or mask*)).mp.         | 211113  |
| 201 | (case control* adj2 (study or studies)).mp.                                 | 287179  |
| 202 | (comparative adj2 (trial? or study or studies)).mp.                         | 1878110 |
| 203 | (conceal* adj2 allocat*).mp.                                                | 2322    |
| 204 | (controlled adj1 clinical adj2 (trial? or study or studies)).mp.            | 122051  |
| 205 | (cross-sectional* adj2 (study or studies)).mp.                              | 315684  |
| 206 | (equivalen* adj4 (trial? or study or studies)).mp.                          | 3963    |



|            |                                                                                     |            |
|------------|-------------------------------------------------------------------------------------|------------|
| 207        | (evaluation adj1 (study or studies)).mp.                                            | 368829     |
| 208        | (longitudinal* adj2 (study or studies)).mp.                                         | 154344     |
| 209        | (meta-anal* or metanal* or metaanal*).mp.                                           | 149397     |
| 210        | (overview? adj4 (review or reviews)).mp.                                            | 12768      |
| 211        | (pragmatic adj2 (trial? or study or studies)).mp.                                   | 2776       |
| 212        | (prospective* adj2 (study or studies)).mp.                                          | 582174     |
| 213        | (retrospective* adj2 (study or studies)).mp.                                        | 781209     |
| 214        | (superiority adj4 (trial? or study or studies)).mp.                                 | 2513       |
| 215        | (systematic adj4 (review or reviews or overview or overviews)).mp.                  | 131451     |
| 216        | (validation adj1 (study or studies)).mp.                                            | 104785     |
| 217        | cohort*.mp.                                                                         | 528099     |
| 218        | placebo*.mp.                                                                        | 199820     |
| 219        | random*.mp.                                                                         | 1120373    |
| 220        | or/164-219 [ Studies - alphabetical ]                                               | 5387053    |
| <b>221</b> | <b>163 and 220 [ Ehlers-Danlos + Exercise or Physiotherapy or Rehab + Studies ]</b> | <b>338</b> |
|            |                                                                                     |            |
|            | <b>**NIH Librarian additional terms **</b>                                          |            |
| 222        | exp "Rehabilitation of Speech and Language Disorders"/                              | 10272      |
| 223        | exp Language Therapy/                                                               | 1719       |
| 224        | exp Recreation Therapy/                                                             | 112        |
| 225        | exp Rehabilitation, Vocational/                                                     | 10047      |
| 226        | exp Social Support/                                                                 | 67107      |
| 227        | exp Speech Therapy/                                                                 | 6147       |
| 228        | exp Speech, Alaryngeal/                                                             | 1746       |
| 229        | exp Telerehabilitation/                                                             | 249        |
| 230        | exp Voice Training/                                                                 | 1437       |
| 231        | cognitive therap*.mp.                                                               | 2614       |
| 232        | language therapy.mp.                                                                | 2262       |
| 233        | neuropsych.mp.                                                                      | 4          |
| 234        | neuropsychological.mp.                                                              | 104111     |
| 235        | neuropsychologies.mp.                                                               | 1          |
| 236        | neuropsychology.mp.                                                                 | 5800       |
| 237        | occupational therap*.mp.                                                            | 16347      |
| 238        | physiatr*.mp.                                                                       | 1374       |
| 239        | pre-habilitation.mp.                                                                | 15         |

|            |                                                                                                                                                                                                                                                                             |             |
|------------|-----------------------------------------------------------------------------------------------------------------------------------------------------------------------------------------------------------------------------------------------------------------------------|-------------|
| 240        | recreation* therap*.mp.                                                                                                                                                                                                                                                     | 238         |
| 241        | rehabilit*.jw.                                                                                                                                                                                                                                                              | 63771       |
| 242        | social support.mp.                                                                                                                                                                                                                                                          | 78037       |
| 243        | speech therap*.mp.                                                                                                                                                                                                                                                          | 7692        |
| 244        | tele-rehab*.mp.                                                                                                                                                                                                                                                             | 87          |
| 245        | voice training.mp.                                                                                                                                                                                                                                                          | 1498        |
| 246        | or/222-245 [ Rehab 25 Potentially New Terms from NIH Librarian ]                                                                                                                                                                                                            | 281072      |
| 247        | 152 or 246 [ Marina Rehab or NIH Librarian new Rehab Terms ]                                                                                                                                                                                                                | 3876371     |
| <b>248</b> | <b>55 and 247 [ EDS + (Marina OR NIH Lib) ]</b>                                                                                                                                                                                                                             | <b>1445</b> |
|            |                                                                                                                                                                                                                                                                             |             |
|            | <i>Limits applied:</i>                                                                                                                                                                                                                                                      |             |
| 249        | limit 248 to english language                                                                                                                                                                                                                                               | 1322        |
| 250        | exp animals/ not (exp animals/ and exp humans/)                                                                                                                                                                                                                             | 4587692     |
| 251        | 249 not 250                                                                                                                                                                                                                                                                 | 1250        |
| 252        | limit 249 to humans                                                                                                                                                                                                                                                         | 1236        |
| 253        | 251 or 252                                                                                                                                                                                                                                                                  | 1250        |
| 254        | limit 253 to ("all infant (birth to 23 months)" or "all child (0 to 18 years)" or "newborn infant (birth to 1 month)" or "infant (1 to 23 months)" or "preschool child (2 to 5 years)" or "child (6 to 12 years)" or "adolescent (13 to 18 years)")                         | 496         |
| 255        | 253 not 254                                                                                                                                                                                                                                                                 | 754         |
| 256        | limit 253 to ("all adult (19 plus years)" or "young adult (19 to 24 years)" or "adult (19 to 44 years)" or "young adult and adult (19-24 and 19-44)" or "middle age (45 to 64 years)" or "middle aged (45 plus years)" or "all aged (65 and over)" or "aged (80 and over)") | 671         |
| 257        | 255 or 256                                                                                                                                                                                                                                                                  | 963         |
| 258        | remove duplicates from 257                                                                                                                                                                                                                                                  | 962         |
|            |                                                                                                                                                                                                                                                                             |             |
|            |                                                                                                                                                                                                                                                                             |             |
| 259        | 220 and 258 [ EDS + (Marina OR NIH Lib) + Studies ]                                                                                                                                                                                                                         | 342         |
| 260        | 259 not 221                                                                                                                                                                                                                                                                 | 4           |

Bottom line:

|     |                                                                                       |     |
|-----|---------------------------------------------------------------------------------------|-----|
| 221 | 163 and 220 [ Ehlers-Danlos + Exercise or Physiotherapy or Rehab + Studies (Marina) ] | 338 |
| 259 | 220 and 258 [ EDS + (Marina OR NIH Lib) + Studies ]                                   | 342 |
| 260 | 259 not 221                                                                           | 4   |

**Table C:** List of extracted parameters

| <b>Cluster</b>          | <b>Data Abbreviation</b>           | <b>Data Description</b>                                                                     |
|-------------------------|------------------------------------|---------------------------------------------------------------------------------------------|
| Study reference         | Author                             | Primary author of reference                                                                 |
|                         | Full title                         | Full title                                                                                  |
|                         | YoP                                | Year of publication                                                                         |
|                         | YoE                                | Year of execution                                                                           |
| Study design            | Design                             | Design of study                                                                             |
|                         | Country                            | Country where study was performed                                                           |
|                         | Funding                            | Was the study funded?                                                                       |
|                         | C.o.I reported                     | Have the authors reported a conflict of interest?                                           |
|                         | Objective                          | Description of the main objective.                                                          |
| Method                  | Inclusion Criteria                 | All inclusion criteria as reported in the original study                                    |
|                         | Exclusion Criteria                 | All exclusion criteria as reported in the original study                                    |
|                         | Exercise intervention              | Program length, duration of 1 session, frequency per week, intensity (max heart rate), type |
| Patient Characteristics | Total number randomized            | Number of patients that are randomized in the study                                         |
|                         | Total number completed             | Number of patients completing the study                                                     |
|                         | Significant difference in baseline | Are there significant differences at baseline? Describe differences.                        |
|                         | Number of randomized for IG and CG | Number of patients in intervention group and control group after randomization              |
|                         | Male %                             | Percentage of men in study                                                                  |
|                         | Age: IG and CG                     | Mean age, range and standard deviation of intervention group and control group.             |
| Outcomes                | Definition                         | Report of the outcome as described by authors                                               |
|                         | Assessment Method                  | How is outcome measured?                                                                    |
|                         | Endpoint                           | When is the outcome measured?                                                               |
|                         | Results                            | Statistically significant findings                                                          |
| Other                   | Limitations                        | Limitations as mentioned by the authors                                                     |
|                         | Conclusion                         | Conclusions as mentioned by the authors                                                     |
|                         | Comments                           | Relevant/notable comments                                                                   |
